# Supplementary material
Source: ML conference proceedings conference paper supplement (https://proceedings.neurips.cc/paper_files/paper/2021/hash/c315f0320b7cd4ec85756fac52d78076-Abstract.html)
Supplement: Supplementary file 1 [file c315f0320b7cd4ec85756fac52d78076-Supplemental.zip]

Archive with 2 entries (2 files):
- identity_supp.pdf
- __MACOSX/._identity_supp.pdf
